# Supplementary material for: Occupational bladder cancer: A cross section survey of previous employments, tasks and exposures matched to cancer phenotypes
Source: PubMed Central journal article supplement (PMC7577448; doi:10.1371/journal.pone.0239338), 2020-10-21
Supplement: pone.0239338.s001.pdf [file pone.0239338.s001.pdf]

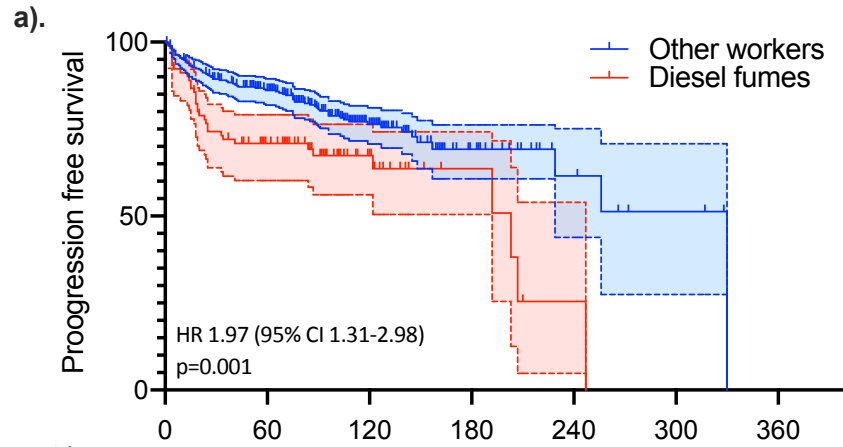

No. at risk

|                 | 0   | 60  | 120 | 180 | 240 | 300 | 360 |
|-----------------|-----|-----|-----|-----|-----|-----|-----|
| Other workers   | 332 | 254 | 104 | 23  | 7   | 3   | 0   |
| Diesel exposure | 91  | 55  | 20  | 6   | 1   | 0   | 0   |

Follow up (Months)

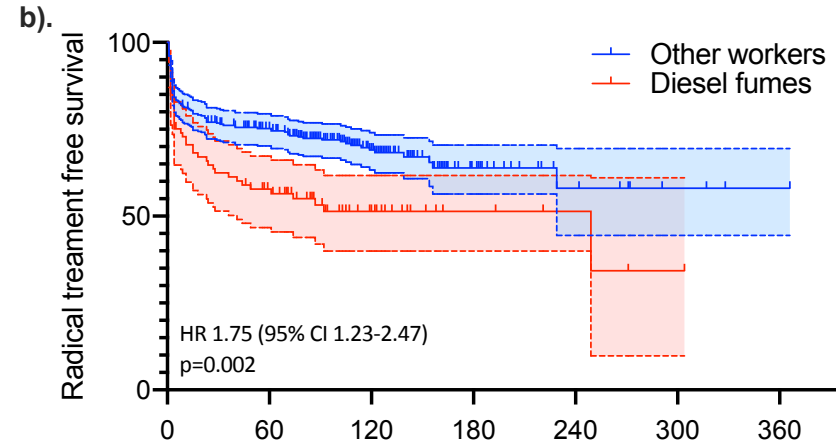

No. at risk

|                 | 0   | 60  | 120 | 180 | 240 | 300 | 360 |
|-----------------|-----|-----|-----|-----|-----|-----|-----|
| Other workers   | 337 | 224 | 97  | 24  | 8   | 1   | 0   |
| Diesel exposure | 89  | 46  | 19  | 6   | 1   | 0   | 0   |

Follow up (Months)

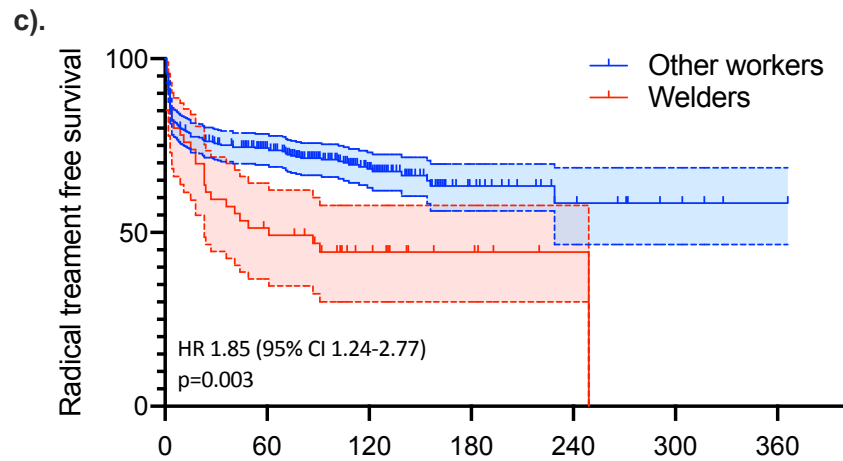

No. at risk

|               | 0   | 60  | 120 | 180 | 240 | 300 | 360 |
|---------------|-----|-----|-----|-----|-----|-----|-----|
| Other workers | 375 | 249 | 104 | 25  | 13  | 5   | 1   |
| Welders       | 51  | 25  | 13  | 5   | 2   | 0   | 0   |

Follow up (Months)

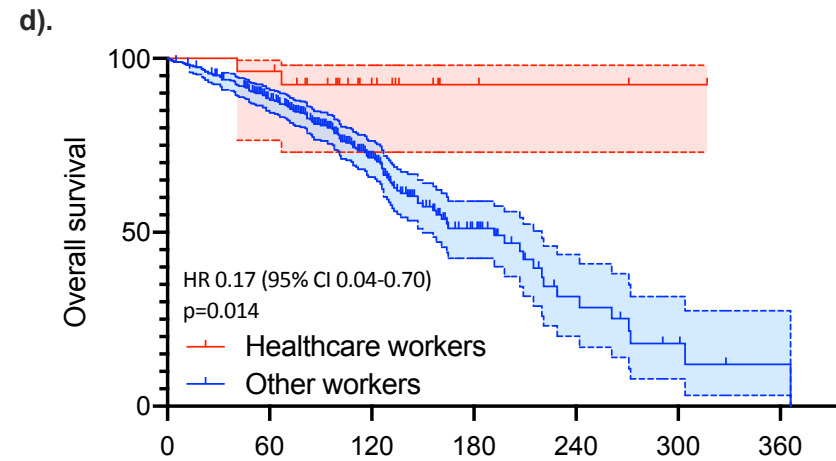

No. at risk

|               | 0   | 60  | 120 | 180 | 240 | 300 | 360 |
|---------------|-----|-----|-----|-----|-----|-----|-----|
| Other workers | 395 | 322 | 136 | 32  | 12  | 5   | 1   |
| Healthcare    | 27  | 27  | 11  | 4   | 3   | 2   | 1   |

Follow up (Months)
